# Supplementary material for: Chimeric antigen receptor–induced BCL11B suppression propagates NK-like cell development
Source: JCI journal article supplement (doi:10.1172/jci126350), 2019-09-03
Supplement: sd1 [file 1]

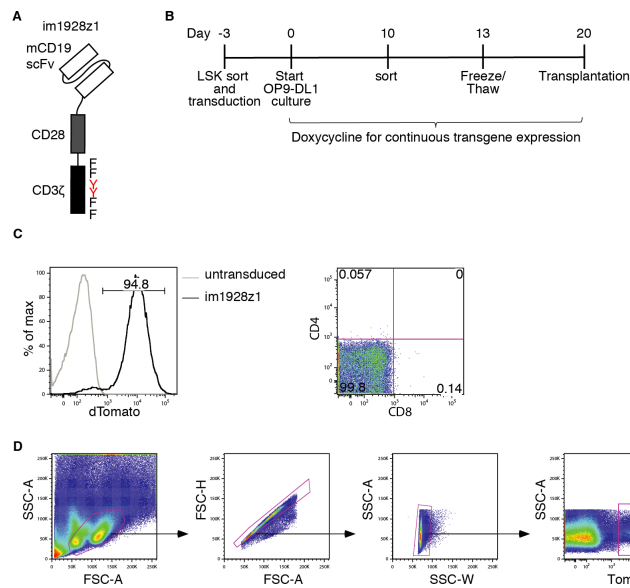

**Supplemental Figure 1. Successful generation of double-negative (DN) engineered lymphoid progenitors in vitro.** (A) Scheme of the mouse CD19 CAR construct m1928z1 and the configuration of signaling moieties. (B) Time line for in vitro differentiation and culture of engineered lymphoid progenitors. Lineage<sup>-</sup>c-kit<sup>+</sup> and Sca-1<sup>+</sup> hematopoietic stem and progenitor cells (LSK) were sorted from bone marrow and transduced with lentiviral supernatant on day -3. OP9-DL1 and LSK co-culture in the presence of IL-7, FLT3-L and Doxycycline started on day 0 and lymphoid progenitors were transferred to new OP9-DL1 cells every 3-4 days. After a sorting step on day 10, Tom<sup>+</sup> cells were frozen on day 13. For adoptive transfer experiments, engineered lymphoid progenitors were thawed and re-cultured on OP9-DL1 with cytokines for another 7 days. (C) Representative FACS plots of dTomato expression (left), CD4 and CD8 expression (right) on im1928z1 CAR-engineered lymphoid progenitors on day 20 of in vitro culture. (D) Gating strategy for FACS analysis of transgene-positive CAR lymphoid progenitors and their progenies.

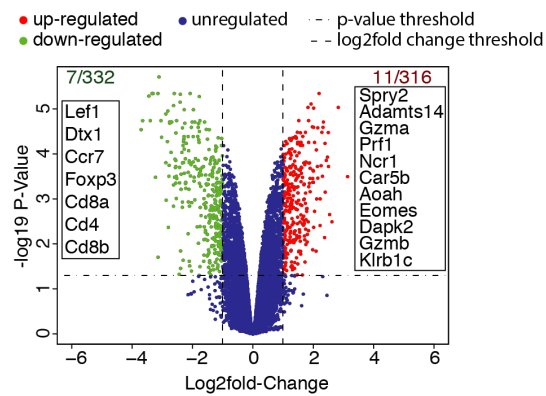

16

17 **Supplemental Figure 2. CARiK cells derived from im1928z1-expressing lymphoid**  
 18 **progenitors exhibited a NK cell-like transcriptional program.** Volcano plot for comparison  
 19 of differently regulated transcripts in either im1928z1 or iTom lymphoid progenitor-derived  
 20 progeny (harvested from spleens 28 days after transplantation). Gene symbols in the boxes  
 21 indicate selected transcripts found to be significantly down-regulated (green) or up-regulated  
 22 (red) by at least twofold in im1928z1 progenies when compared to iTom progenies.

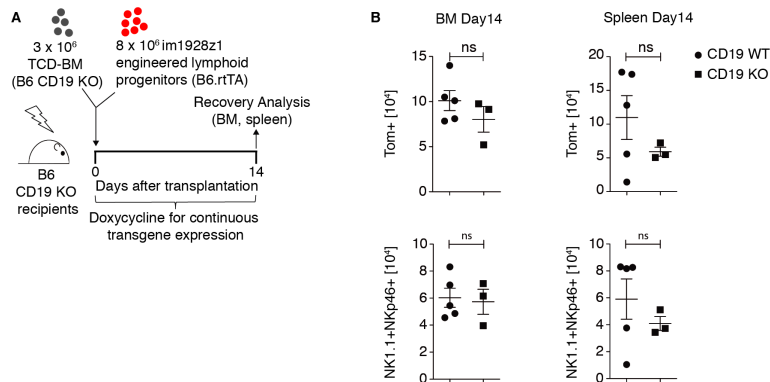

**Supplemental Figure 3. im1928z1-lymphoid progenitors demonstrated similar development in wildtype and *Cd19* KO mice.** (A) Irradiated B6 CD19 KO recipients received 3 x 10<sup>6</sup> B6 *Cd19* knockout TCD-BM and 8 x 10<sup>6</sup> im1928z1-lymphoid progenitors. (B) Single cell suspensions were generated from harvested BM and spleens 14 days after AT. Numbers of Tom<sup>+</sup> and NK1.1<sup>+</sup>NKp46<sup>+</sup> progenies in BM and spleens in either B6 CD19 KO (n= 3) or B6 CD19 WT recipients (n= 5) mice are depicted. Gating was done on the Tom<sup>+</sup> population. Statistics were performed by using the two-tailed Students t-test. Data represent means ± s.e.m. No significant differences were detected. ns, not significant.

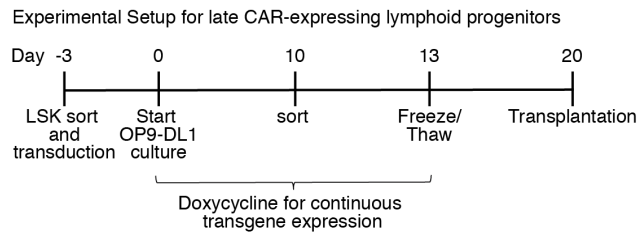

**Supplemental Figure 4. Experimental setup for the generation of lymphoid progenitors with delayed im1928z1 expression.** Time line for in vitro generation of engineered lymphoid progenitors for late CAR expression experiments. LSK cells were sorted from bone marrow and consecutively transduced with lentiviral supernatant on day -3. OP9-DL1/LSK co-culture in the presence of IL-7 and FLT3-L and Doxycycline started on day 0 in order to allow a sorting step on day 10. Tom<sup>+</sup> cells were frozen on day 13. For AT experiments, engineered lymphoid progenitors were thawed and re-cultured on OP9-DL1 at this point omitting Doxycycline before co-transplantation.

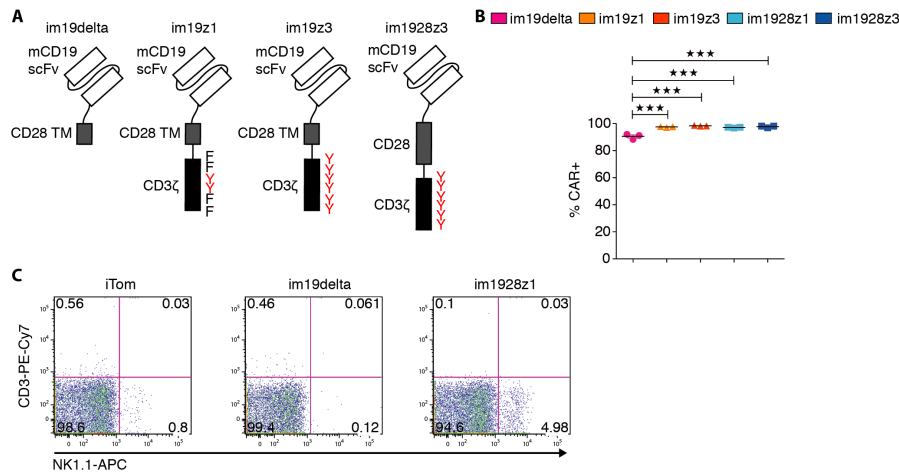

**Supplemental Figure 5. CAR design impacts lymphoid progenitor development. (A)** Scheme of the mouse CD19 CAR constructs im19delta, im19z1, im19z3, and im1928z3 and their configuration in respect of signaling moieties. **(B)** Frequencies of CAR<sup>+</sup> lymphoid progenitors within the Tom<sup>+</sup> gate with indicated CAR constructs on day 20 of in vitro culture. Comparisons were performed by using one-way ANOVA analysis with Tukey's post-test. Data from a representative experiment measured in triplicates are shown and represent means ± s.e.m; \*\*\*P < 0.001. **(C)** Representative FACS plots of NK1.1 and CD3 expression on iTom, im19delta-, and im1928z1-engineered lymphoid progenitors.
